## Application of Health Technology Assessment (HTA) In High, Middle and Low-Income Countries

### Introduction

#### I. The overall purpose of the study

School of Physical and Occupational Therapy at McGill University runs and funds this study to develop a comprehensive understanding of HTAs in seven countries ((Canada, Switzerland, Brazil, Lebanon, Jordan, Palestine and Tanzania) for strengthening and development purposes. Data and results generated from this survey will be secured in a well-protected institutional system and used only for research use and for HTA systems development in these countries.

#### II. Objectives

This survey aims to evaluate the intuitional capacities and processes of HTA in these countries to address the demands for reliable information on health technologies and interventions.

#### III. Scope

Only national or subnational (region/ province/ state) public health entities are included in this survey. It could be a committee, unit, department, agency, universities or clinical and hospital-based settings, NGOs or private entities.

International entities are not in the scope of this survey.

#### IV. Definitions and important clarifying notes

HTA is "a multidisciplinary process that uses explicit methods to determine the value of a health technology at different points in its lifecycle. The purpose is to inform decision making in order to promote an equitable, efficient, and high-quality health system".

Note 1: A health technology is an intervention developed to prevent, diagnose, or treat medical conditions; promote health; provide rehabilitation; or organize healthcare delivery. The intervention can be a test, device, medicine, vaccine, procedure, program, or system.

Note 2: The process is formal, systematic, and transparent, and it uses state-of-the-art methods to consider the best available evidence.

Note 3: The dimensions of value for a health technology may be assessed by examining the intended and unintended consequences of using a health technology compared with existing alternatives. These dimensions often include clinical effectiveness; safety, costs, and economic implications; ethical, social, cultural and legal issues; and organizational and environmental aspects, as well as wider implications for the patient, relatives, caregivers, and the population. The overall value may vary depending on the perspective taken, the stakeholders involved, and the decision context.

Note 4: HTA can be applied at different points in the lifecycle of health technology (ie, pre-market, during market approval, post-market, and through to the disinvestment of a health technology).

Source ([https://www.valueinhealthjournal.com/article/S1098-3015\(20\)32060-X/pdf](https://www.valueinhealthjournal.com/article/S1098-3015(20)32060-X/pdf))

#### V. Instructions

The survey is structured in 6 parts:

Understanding and Perceptions of HTA Application. The use and application of HTA in the health-sector decision-making process Implementation Processes of HTA Governance and Management Resources and capacity supporting HTA processes. Interests and impediments to strengthening the capacity VI. Supplementary information

Please provide any additional information or comments at the end of the survey. Should you require assistance, please contact [mohammed.alkhaldi@mail.mcgill.ca](mailto:mohammed.alkhaldi@mail.mcgill.ca) The submission deadline of the completed electronic survey is one month after you receive it. There are 62 questions in this survey divided into 6 parts. The approximate period of time that will be dedicated to each institution to complete the survey is a month from the time of emailing the electronic questionnaire. (a team from different departments within the institution needs to be formed to collaborate in completing this electronic survey over different rounds and meetings within a defined period of time)

---

Name of Organization:

---

---

Organization sector:

- Public sector (Governmental)
  - Private sector
  - Non-governmental
  - Academic institution
  - Other \_\_\_\_\_
- 

Organization classification:

- national
  - local
  - professional society
  - industry
  - academic/not-for profit
  - hospital
  - private insurer/managed care
  - Other \_\_\_\_\_
- 

Main field of employment:

- Medicine
  - Pharmacy
  - Other health care (e.g., nursing, dietetics)
  - Economics
  - Multidisciplinary
  - Other: \_\_\_\_\_
- 

Country:

---

**PART 1: Understanding and Perceptions of HTA Application**

|                                                                                                        | Very High             | High                  | Moderate              | Weak                  | Very Weak             | Don't Know            |
|--------------------------------------------------------------------------------------------------------|-----------------------|-----------------------|-----------------------|-----------------------|-----------------------|-----------------------|
| 1.1 How do you rate the level of your understanding of HTA concept?                                    | <input type="radio"/> | <input type="radio"/> | <input type="radio"/> | <input type="radio"/> | <input type="radio"/> | <input type="radio"/> |
| 1.2 How do you rate the level of your understanding of HTA purpose?                                    | <input type="radio"/> | <input type="radio"/> | <input type="radio"/> | <input type="radio"/> | <input type="radio"/> | <input type="radio"/> |
| 1.3 How do you rate the applicability of HTA in your organization and health system in general?        | <input type="radio"/> | <input type="radio"/> | <input type="radio"/> | <input type="radio"/> | <input type="radio"/> | <input type="radio"/> |
| 1.4 How do you rate the HTA application in your sector of working?                                     | <input type="radio"/> | <input type="radio"/> | <input type="radio"/> | <input type="radio"/> | <input type="radio"/> | <input type="radio"/> |
| 1.5 How do you rate the level of HTA importance within your organization and health system in general? | <input type="radio"/> | <input type="radio"/> | <input type="radio"/> | <input type="radio"/> | <input type="radio"/> | <input type="radio"/> |
| 1.6 The application of HTA is important and useful in your area of working?                            | <input type="radio"/> | <input type="radio"/> | <input type="radio"/> | <input type="radio"/> | <input type="radio"/> | <input type="radio"/> |

**PART 2: The use and application of HTA in the health-sector decision-making process**

Does your country have any formal process by which information is gathered to support decision-making on new devices, drugs, vaccines etc.?

- Yes  
 No  
 I don't know

The purpose of using HTA in your organization? (check all that apply):

- coverage  
 reimbursement decisions  
 support of pricing decisions  
 support of clinical guidance  
 Other: \_\_\_\_\_

Which model your institution/country is using for HTA initiation and promotion?

- Top-Down Approach (emergence of political interest in promoting an HTA starts at a political level (national or regional) descending to the bottom level.  
 Bottom-Up Approach (research and academic interest that formed a positive interest in HTA among various actors e.g. producers, health professionals, clinicians, decision makers, patients' associations, etc)  
 Converging Approach (a combination of the 1st and 2nd approaches, top and bottom level players and mutual efforts between political players and researchers.

Who initiates the HTA?

- Manufacture  
 Private  
 Authorities  
 Academia  
 Other: \_\_\_\_\_

How is an HTA question or area is identified for assessment?

- Decision from authorities  
 Prioritization exercise  
 Scientific advice and recommendation  
 Public consultation  
 Request from manufacturer or industry about new technologies  
 Other: please specify \_\_\_\_\_

Do you refer any information gathering practices on new interventions (e.g., tests, devices, drugs, vaccines, procedures, programs or system) to support decision making as Health Technology Assessment (HTA)?

- Yes  
 No  
 I don't know

For what purpose is this information gathered? Please choose all that apply:

- Certificate of need/carte sanitaire  
 Clinical practice guidelines and protocols  
 Planning and budgeting  
 Pricing of health products  
 Indicators of quality of care  
 Reimbursement/ package of benefits  
 benefits and adverse events assessment  
 Other (please specify): \_\_\_\_\_

What are the main data sources your institution/country use in HAT?

- Primary such as disease registries, observational studies and electronic health records
- Secondary sources such as electronic databases and search engines searching of the randomized clinical trials, studies, systematic review, metanalyses, gray literature, Web sites, reports, student theses), and hand searching of selected journals or references of key papers
- Both sources
- Other methodologies and sources such as qualitative data (interviews, focus group,.. etc)
- I don't know

How the HTA data are collected?

- Submission by manufacturer
- Submission by representative
- Collection by authority
- Other (please specify) \_\_\_\_\_

Select the areas where HTA is used as an element of the decision-making process. Please choose all that apply:

- Clinical interventions (diagnostic measurements and therapeutic interventions including rehabilitation)
- Medical devices (in-vitro diagnostics and laboratory equipment, imaging equipment, single use devices, assistive devices).
- Medicines
- Population level health interventions (prevention and promotion)
- Service delivery models
- Surgical interventions
- Vaccines
- Digital technologies (e-health/medicine, telehealth/medicine, or any digital interventions)
- Other (please specify): \_\_\_\_\_

How are the HTA findings used?

- Reports are used on a national basis by legislation (ie, adopted nationally by legislation)
- Reports are used on a regional basis by legislation (ie, adopted regionally by legislation)
- Reports are used on a sectoral basis (ie, voluntarily adopted sectorally)
- Reports are used on a professional basis (voluntarily adopted professionally)
- Reports are used on an institutional entity basis (ie, voluntarily adopted by institutions)
- Reports of scientific evidence are used on institutional and national basis (advisable by scientists and scientific institutions)
- Other, specify \_\_\_\_\_

Does the organization making the decision rely on the conclusions of the assessment? If the answer yes, please give examples on decisions that more influenced by HTA than others ie reimbursement of new medicines, pricing, acquisition of devices etc

- Yes, completely \_\_\_\_\_
- Yes, partially \_\_\_\_\_
- HTA is only one element of informing the decision
- No, they make their own decision
- Other, please specify: \_\_\_\_\_

### PART 3: Implementation Processes of HTA

From the following listed below, what are the most important dimensions of value for HTA that meet your institution/country's health priorities and needs? Please check all that apply below:

- Safety
- Clinical effectiveness
- Costs and economic evaluation (Cost-effectiveness analysis, budget analysis, utilization, unit cost, indirect costs, real world outcomes)
- Equity and equality issues
- Feasibility considerations (e.g. availability of: budget , human resources, infrastructure)
- Patients'/citizens'/community' acceptability (meeting their needs and evidence for relevant outcomes improvement), views, communication and involvement
- Organizational impact
- Ethical issues
- Environmental and political aspects
- Legal and cultural aspects (regulations, binding rules, licensing and property rights, ... etc)

At what evolutionary stage of a technology is it likely to be assessed? (for drugs, medical devices, and other technologies, check all that apply)

- Emerging technology (in development, pre-launch)
- New technology (after Market authorization)
- Established or widespread practice (widely or frequently used (monthly and annually) after Market authorization)
- Further development of technology (such as value-added medicines, renovating, repurposing, or new evidence generation)
- Declining use in practice (testing need for disinvestment)
- At regular intervals (e.g. every 5 years)
- Other \_\_\_\_\_

Do you repeat the assessment in regular intervals including after the marketing of the product?

- Yes (specify these intervals and/or what is the element triggering a reassessment): \_\_\_\_\_
- No
- N/A

**Please estimate which of the following aspects are covered in HTA for clinical interventions and how frequently? Please choose the appropriate response for each item:**

|                                                                                                                                                                     | Never, almost<br>never (0%- 19%) | A few times<br>(20%-39) | Sometimes<br>(40%-59%) | Frequently<br>(60%-79%) | Always, almost<br>always<br>(80%-100%) |
|---------------------------------------------------------------------------------------------------------------------------------------------------------------------|----------------------------------|-------------------------|------------------------|-------------------------|----------------------------------------|
| Safety                                                                                                                                                              | <input type="radio"/>            | <input type="radio"/>   | <input type="radio"/>  | <input type="radio"/>   | <input type="radio"/>                  |
| Clinical effectiveness                                                                                                                                              | <input type="radio"/>            | <input type="radio"/>   | <input type="radio"/>  | <input type="radio"/>   | <input type="radio"/>                  |
| Costs and economic evaluation<br>(Cost-effectiveness analysis,<br>budget analysis, utilization, unit<br>cost, indirect costs, outcomes)                             | <input type="radio"/>            | <input type="radio"/>   | <input type="radio"/>  | <input type="radio"/>   | <input type="radio"/>                  |
| Organizational impact                                                                                                                                               | <input type="radio"/>            | <input type="radio"/>   | <input type="radio"/>  | <input type="radio"/>   | <input type="radio"/>                  |
| Equity and equality issues                                                                                                                                          | <input type="radio"/>            | <input type="radio"/>   | <input type="radio"/>  | <input type="radio"/>   | <input type="radio"/>                  |
| Ethical issues                                                                                                                                                      | <input type="radio"/>            | <input type="radio"/>   | <input type="radio"/>  | <input type="radio"/>   | <input type="radio"/>                  |
| Feasibility considerations (e.g.<br>availability of: budget , human<br>resources, infrastructure)                                                                   | <input type="radio"/>            | <input type="radio"/>   | <input type="radio"/>  | <input type="radio"/>   | <input type="radio"/>                  |
| Patients'/citizens'/community'<br>acceptability (meeting their<br>needs and evidence for relevant<br>outcomes improvement), views,<br>communication and involvement | <input type="radio"/>            | <input type="radio"/>   | <input type="radio"/>  | <input type="radio"/>   | <input type="radio"/>                  |
| Legal aspects (regulations,<br>binding rules, licensing and<br>property rights, ... etc)                                                                            | <input type="radio"/>            | <input type="radio"/>   | <input type="radio"/>  | <input type="radio"/>   | <input type="radio"/>                  |

**Please estimate which of the following aspects are covered in HTA for medical devices and how frequently? Please choose the appropriate response for each item:**

|                                                                                                                                                                     | Never, almost<br>never (0%- 19%) | A few times<br>(20%-39) | Sometimes<br>(40%-59%) | Frequently<br>(60%-79%) | Always, almost<br>always<br>(80%-100%) |
|---------------------------------------------------------------------------------------------------------------------------------------------------------------------|----------------------------------|-------------------------|------------------------|-------------------------|----------------------------------------|
| Safety                                                                                                                                                              | <input type="radio"/>            | <input type="radio"/>   | <input type="radio"/>  | <input type="radio"/>   | <input type="radio"/>                  |
| Clinical effectiveness                                                                                                                                              | <input type="radio"/>            | <input type="radio"/>   | <input type="radio"/>  | <input type="radio"/>   | <input type="radio"/>                  |
| Costs and economic evaluation<br>(Cost-effectiveness analysis,<br>budget analysis, utilization, unit<br>cost, indirect costs, outcomes)                             | <input type="radio"/>            | <input type="radio"/>   | <input type="radio"/>  | <input type="radio"/>   | <input type="radio"/>                  |
| Organizational impact                                                                                                                                               | <input type="radio"/>            | <input type="radio"/>   | <input type="radio"/>  | <input type="radio"/>   | <input type="radio"/>                  |
| Equity and equality issues                                                                                                                                          | <input type="radio"/>            | <input type="radio"/>   | <input type="radio"/>  | <input type="radio"/>   | <input type="radio"/>                  |
| Ethical issues                                                                                                                                                      | <input type="radio"/>            | <input type="radio"/>   | <input type="radio"/>  | <input type="radio"/>   | <input type="radio"/>                  |
| Feasibility considerations (e.g.<br>availability of: budget , human<br>resources, infrastructure)                                                                   | <input type="radio"/>            | <input type="radio"/>   | <input type="radio"/>  | <input type="radio"/>   | <input type="radio"/>                  |
| Patients'/citizens'/community'<br>acceptability (meeting their<br>needs and evidence for relevant<br>outcomes improvement), views,<br>communication and involvement | <input type="radio"/>            | <input type="radio"/>   | <input type="radio"/>  | <input type="radio"/>   | <input type="radio"/>                  |
| Legal aspects (regulations,<br>binding rules, licensing and<br>property rights, ... etc)                                                                            | <input type="radio"/>            | <input type="radio"/>   | <input type="radio"/>  | <input type="radio"/>   | <input type="radio"/>                  |

**Please estimate which of the following aspects are covered in HTA for medicines and how frequently? Please choose the appropriate response for each item**

|                                                                                                                                                                     | Never, almost<br>never (0%- 19%) | A few times<br>(20%-39) | Sometimes<br>(40%-59%) | Frequently<br>(60%-79%) | Always, almost<br>always<br>(80%-100%) |
|---------------------------------------------------------------------------------------------------------------------------------------------------------------------|----------------------------------|-------------------------|------------------------|-------------------------|----------------------------------------|
| Safety                                                                                                                                                              | <input type="radio"/>            | <input type="radio"/>   | <input type="radio"/>  | <input type="radio"/>   | <input type="radio"/>                  |
| Clinical effectiveness                                                                                                                                              | <input type="radio"/>            | <input type="radio"/>   | <input type="radio"/>  | <input type="radio"/>   | <input type="radio"/>                  |
| Costs and economic evaluation<br>(Cost-effectiveness analysis,<br>budget analysis, utilization, unit<br>cost, indirect costs, outcomes)                             | <input type="radio"/>            | <input type="radio"/>   | <input type="radio"/>  | <input type="radio"/>   | <input type="radio"/>                  |
| Organizational impact                                                                                                                                               | <input type="radio"/>            | <input type="radio"/>   | <input type="radio"/>  | <input type="radio"/>   | <input type="radio"/>                  |
| Equity and equality issues                                                                                                                                          | <input type="radio"/>            | <input type="radio"/>   | <input type="radio"/>  | <input type="radio"/>   | <input type="radio"/>                  |
| Ethical issues                                                                                                                                                      | <input type="radio"/>            | <input type="radio"/>   | <input type="radio"/>  | <input type="radio"/>   | <input type="radio"/>                  |
| Feasibility considerations (e.g.<br>availability of: budget , human<br>resources, infrastructure)                                                                   | <input type="radio"/>            | <input type="radio"/>   | <input type="radio"/>  | <input type="radio"/>   | <input type="radio"/>                  |
| Patients'/citizens'/community'<br>acceptability (meeting their<br>needs and evidence for relevant<br>outcomes improvement), views,<br>communication and involvement | <input type="radio"/>            | <input type="radio"/>   | <input type="radio"/>  | <input type="radio"/>   | <input type="radio"/>                  |
| Legal aspects (regulations,<br>binding rules, licensing and<br>property rights, ... etc)                                                                            | <input type="radio"/>            | <input type="radio"/>   | <input type="radio"/>  | <input type="radio"/>   | <input type="radio"/>                  |

**Please estimate which of the following aspects are covered in HTA for population level health interventions (public health interventions) and how frequently? Please choose the appropriate response for each item**

|                                                                                                                                                                     | Never, almost<br>never (0%- 19%) | A few times<br>(20%-39) | Sometimes<br>(40%-59%) | Frequently<br>(60%-79%) | Always, almost<br>always<br>(80%-100%) |
|---------------------------------------------------------------------------------------------------------------------------------------------------------------------|----------------------------------|-------------------------|------------------------|-------------------------|----------------------------------------|
| Safety                                                                                                                                                              | <input type="radio"/>            | <input type="radio"/>   | <input type="radio"/>  | <input type="radio"/>   | <input type="radio"/>                  |
| Clinical effectiveness                                                                                                                                              | <input type="radio"/>            | <input type="radio"/>   | <input type="radio"/>  | <input type="radio"/>   | <input type="radio"/>                  |
| Costs and economic evaluation<br>(Cost-effectiveness analysis,<br>budget analysis, utilization, unit<br>cost, indirect costs, outcomes)                             | <input type="radio"/>            | <input type="radio"/>   | <input type="radio"/>  | <input type="radio"/>   | <input type="radio"/>                  |
| Organizational impact                                                                                                                                               | <input type="radio"/>            | <input type="radio"/>   | <input type="radio"/>  | <input type="radio"/>   | <input type="radio"/>                  |
| Equity and equality issues                                                                                                                                          | <input type="radio"/>            | <input type="radio"/>   | <input type="radio"/>  | <input type="radio"/>   | <input type="radio"/>                  |
| Ethical issues                                                                                                                                                      | <input type="radio"/>            | <input type="radio"/>   | <input type="radio"/>  | <input type="radio"/>   | <input type="radio"/>                  |
| Feasibility considerations (e.g.<br>availability of: budget , human<br>resources, infrastructure)                                                                   | <input type="radio"/>            | <input type="radio"/>   | <input type="radio"/>  | <input type="radio"/>   | <input type="radio"/>                  |
| Patients'/citizens'/community'<br>acceptability (meeting their<br>needs and evidence for relevant<br>outcomes improvement), views,<br>communication and involvement | <input type="radio"/>            | <input type="radio"/>   | <input type="radio"/>  | <input type="radio"/>   | <input type="radio"/>                  |
| Legal aspects (regulations,<br>binding rules, licensing and<br>property rights, ... etc)                                                                            | <input type="radio"/>            | <input type="radio"/>   | <input type="radio"/>  | <input type="radio"/>   | <input type="radio"/>                  |

**Please estimate which of the following aspects are covered in HTA for service delivery models and how frequently? Please choose the appropriate response for each item**

|                                                                                                                                                                     | Never, almost<br>never (0%- 19%) | A few times<br>(20%-39) | Sometimes<br>(40%-59%) | Frequently<br>(60%-79%) | Always, almost<br>always<br>(80%-100%) |
|---------------------------------------------------------------------------------------------------------------------------------------------------------------------|----------------------------------|-------------------------|------------------------|-------------------------|----------------------------------------|
| Safety                                                                                                                                                              | <input type="radio"/>            | <input type="radio"/>   | <input type="radio"/>  | <input type="radio"/>   | <input type="radio"/>                  |
| Clinical effectiveness                                                                                                                                              | <input type="radio"/>            | <input type="radio"/>   | <input type="radio"/>  | <input type="radio"/>   | <input type="radio"/>                  |
| Costs and economic evaluation<br>(Cost-effectiveness analysis,<br>budget analysis, utilization, unit<br>cost, indirect costs, outcomes)                             | <input type="radio"/>            | <input type="radio"/>   | <input type="radio"/>  | <input type="radio"/>   | <input type="radio"/>                  |
| Organizational impact                                                                                                                                               | <input type="radio"/>            | <input type="radio"/>   | <input type="radio"/>  | <input type="radio"/>   | <input type="radio"/>                  |
| Equity and equality issues                                                                                                                                          | <input type="radio"/>            | <input type="radio"/>   | <input type="radio"/>  | <input type="radio"/>   | <input type="radio"/>                  |
| Ethical issues                                                                                                                                                      | <input type="radio"/>            | <input type="radio"/>   | <input type="radio"/>  | <input type="radio"/>   | <input type="radio"/>                  |
| Feasibility considerations (e.g.<br>availability of: budget , human<br>resources, infrastructure)                                                                   | <input type="radio"/>            | <input type="radio"/>   | <input type="radio"/>  | <input type="radio"/>   | <input type="radio"/>                  |
| Patients'/citizens'/community'<br>acceptability (meeting their<br>needs and evidence for relevant<br>outcomes improvement), views,<br>communication and involvement | <input type="radio"/>            | <input type="radio"/>   | <input type="radio"/>  | <input type="radio"/>   | <input type="radio"/>                  |
| Legal aspects (regulations,<br>binding rules, licensing and<br>property rights, ... etc)                                                                            | <input type="radio"/>            | <input type="radio"/>   | <input type="radio"/>  | <input type="radio"/>   | <input type="radio"/>                  |

**Please estimate which of the following aspects are covered in the HTA for surgical interventions and how frequently? Please choose the appropriate response for each item**

|                                                                                                                                                                     | Never, almost<br>never (0%- 19%) | A few times<br>(20%-39) | Sometimes<br>(40%-59%) | Frequently<br>(60%-79%) | Always, almost<br>always<br>(80%-100%) |
|---------------------------------------------------------------------------------------------------------------------------------------------------------------------|----------------------------------|-------------------------|------------------------|-------------------------|----------------------------------------|
| Safety                                                                                                                                                              | <input type="radio"/>            | <input type="radio"/>   | <input type="radio"/>  | <input type="radio"/>   | <input type="radio"/>                  |
| Clinical effectiveness                                                                                                                                              | <input type="radio"/>            | <input type="radio"/>   | <input type="radio"/>  | <input type="radio"/>   | <input type="radio"/>                  |
| Costs and economic evaluation<br>(Cost-effectiveness analysis,<br>budget analysis, utilization, unit<br>cost, indirect costs, outcomes)                             | <input type="radio"/>            | <input type="radio"/>   | <input type="radio"/>  | <input type="radio"/>   | <input type="radio"/>                  |
| Organizational impact                                                                                                                                               | <input type="radio"/>            | <input type="radio"/>   | <input type="radio"/>  | <input type="radio"/>   | <input type="radio"/>                  |
| Equity and equality issues                                                                                                                                          | <input type="radio"/>            | <input type="radio"/>   | <input type="radio"/>  | <input type="radio"/>   | <input type="radio"/>                  |
| Ethical issues                                                                                                                                                      | <input type="radio"/>            | <input type="radio"/>   | <input type="radio"/>  | <input type="radio"/>   | <input type="radio"/>                  |
| Feasibility considerations (e.g.<br>availability of: budget , human<br>resources, infrastructure)                                                                   | <input type="radio"/>            | <input type="radio"/>   | <input type="radio"/>  | <input type="radio"/>   | <input type="radio"/>                  |
| Patients'/citizens'/community'<br>acceptability (meeting their<br>needs and evidence for relevant<br>outcomes improvement), views,<br>communication and involvement | <input type="radio"/>            | <input type="radio"/>   | <input type="radio"/>  | <input type="radio"/>   | <input type="radio"/>                  |
| Legal aspects (regulations,<br>binding rules, licensing and<br>property rights, ... etc)                                                                            | <input type="radio"/>            | <input type="radio"/>   | <input type="radio"/>  | <input type="radio"/>   | <input type="radio"/>                  |

**Please estimate which of the following aspects are covered in the HTA for vaccines and how frequently? Please choose the appropriate response for each item**

|                                                                                                                                                         | Never, almost never (0%- 19%) | A few times (20%-39)  | Sometimes (40%-59%)   | Frequently (60%-79%)  | Always, almost always (80%-100%) |
|---------------------------------------------------------------------------------------------------------------------------------------------------------|-------------------------------|-----------------------|-----------------------|-----------------------|----------------------------------|
| Safety                                                                                                                                                  | <input type="radio"/>         | <input type="radio"/> | <input type="radio"/> | <input type="radio"/> | <input type="radio"/>            |
| Clinical effectiveness                                                                                                                                  | <input type="radio"/>         | <input type="radio"/> | <input type="radio"/> | <input type="radio"/> | <input type="radio"/>            |
| Costs and economic evaluation<br>(Cost-effectiveness analysis, budget analysis, utilization, unit cost, indirect costs, outcomes)                       | <input type="radio"/>         | <input type="radio"/> | <input type="radio"/> | <input type="radio"/> | <input type="radio"/>            |
| Organizational impact                                                                                                                                   | <input type="radio"/>         | <input type="radio"/> | <input type="radio"/> | <input type="radio"/> | <input type="radio"/>            |
| Equity and equality issues                                                                                                                              | <input type="radio"/>         | <input type="radio"/> | <input type="radio"/> | <input type="radio"/> | <input type="radio"/>            |
| Ethical issues                                                                                                                                          | <input type="radio"/>         | <input type="radio"/> | <input type="radio"/> | <input type="radio"/> | <input type="radio"/>            |
| Feasibility considerations (e.g. availability of: budget , human resources, infrastructure)                                                             | <input type="radio"/>         | <input type="radio"/> | <input type="radio"/> | <input type="radio"/> | <input type="radio"/>            |
| Patients'/citizens'/community' acceptability (meeting their needs and evidence for relevant outcomes improvement), views, communication and involvement | <input type="radio"/>         | <input type="radio"/> | <input type="radio"/> | <input type="radio"/> | <input type="radio"/>            |
| Legal aspects (regulations, binding rules, licensing and property rights, ... etc)                                                                      | <input type="radio"/>         | <input type="radio"/> | <input type="radio"/> | <input type="radio"/> | <input type="radio"/>            |

Are there any guidelines, models, frame works, manuals, toolkits or standards (developed by WHO-HTA Glossary Committee; INAHTA; EUnetHTA; International decision support initiative (iDSI); the International Society for Pharmacoeconomics and Outcomes Research (ISPOR); Asia (HTAsiaLink), the Americas (RedETSA); and.. etc) applied for preparing and developing HTA reports in your institution?

- Yes  
 No  
 I don't Know

If Yes, please indicate the followed guidelines:

- Domestic guidelines created and developed by your own institution  
 WHO guidelines developed by HTA Glossary Committee.  
 INAHTA guidelines.  
 EUnetHTA guidelines  
 iDSI guidelines  
 ISPOR guidelines  
 HTAsiaLink guidelines  
 Americas RedETSA guidelines  
 please specify \_\_\_\_\_

---

Which of the following areas listed below have guidelines (among of above ones) and applied for producing and preparing HTA report in your institution? Please choose all that apply:

- Clinical interventions (diagnostic measurements and therapeutic interventions including rehabilitation)
- Medical devices (in-vitro diagnostics and laboratory equipment, imaging equipment, single use devices, assistive devices).
- Medicines
- Population level health interventions (prevention and promotion)
- Service delivery models
- Surgical interventions
- Vaccines
- None

---

Which of the following areas listed below have defined technical practices or procedures (recommended by WHO-HTA Glossary Committee; INAHTA; EUnetHTA; iDSI; ISPOR; Asia (HTAsiaLink), the Americas (RedETSA); and.. etc)) and applied for submitting HTA reports and mechanisms for communicating them in your institution? Please choose all that apply:

- Clinical interventions (diagnostic measurements and therapeutic interventions including rehabilitation)
- Medical devices (in-vitro diagnostics and laboratory equipment, imaging equipment, single use devices, assistive devices).
- Medicines
- Population level health interventions (prevention and promotion)
- Service delivery models
- Surgical interventions
- Vaccines
- None

**Timelines of HTA process (Please answer each row by ticking a single choice "checkmark" to one applicable option among the four)**

|                    | No timeline           | Not transparent       | Timelines exist but are not binding | Transparent and binding timelines exist |
|--------------------|-----------------------|-----------------------|-------------------------------------|-----------------------------------------|
| HTA conduction     | <input type="radio"/> | <input type="radio"/> | <input type="radio"/>               | <input type="radio"/>                   |
| HTA submission     | <input type="radio"/> | <input type="radio"/> | <input type="radio"/>               | <input type="radio"/>                   |
| HTA acceptance     | <input type="radio"/> | <input type="radio"/> | <input type="radio"/>               | <input type="radio"/>                   |
| HTA review         | <input type="radio"/> | <input type="radio"/> | <input type="radio"/>               | <input type="radio"/>                   |
| HTA recommendation | <input type="radio"/> | <input type="radio"/> | <input type="radio"/>               | <input type="radio"/>                   |
| Appeal procedure   | <input type="radio"/> | <input type="radio"/> | <input type="radio"/>               | <input type="radio"/>                   |
| Decision process   | <input type="radio"/> | <input type="radio"/> | <input type="radio"/>               | <input type="radio"/>                   |

## PART 4: Stewardship and Management

Is the formal process by which HTA information is gathered to support health decision-making is clearly structured and appropriately and systematically managed? \* Please select at most one answer

- Yes  
 No  
 I don't know

NOTE: The process can be within a committee, unit, department or an established HTA organization at a national or subnational level, which provides information for policy decisions for priority-setting, selection, benefit packages, medicines for public procurement, clinical practice guidelines and protocols for public health programmes, etc.

In your country, is there a central agency responsible for HTA management? Please select one answer

- Yes, please state their names \_\_\_\_\_, the role of their authority (legislator, regulator, producer, user, financier, evaluator, etc) \_\_\_\_\_  
 No  
 I don't know

Is there a legislative requirement to consider the process and results of HTAs in the financing and public health decision-making process?

- Yes  
 No  
 I don't know

Legislation on the role or the status of HTA process and the endorsement of its recommendations in decision-making process (one answer for each row is required by putting one checkmark among the columns)

|                               | No formal role in decisions (unlegislated) | Relatively loose and non-transparent | Partial consideration | Must be considered but not binding | Mandatory binding (legislated) | Don't know            |
|-------------------------------|--------------------------------------------|--------------------------------------|-----------------------|------------------------------------|--------------------------------|-----------------------|
| HTA process                   | <input type="radio"/>                      | <input type="radio"/>                | <input type="radio"/> | <input type="radio"/>              | <input type="radio"/>          | <input type="radio"/> |
| Local evidence                | <input type="radio"/>                      | <input type="radio"/>                | <input type="radio"/> | <input type="radio"/>              | <input type="radio"/>          | <input type="radio"/> |
| Regional evidence             | <input type="radio"/>                      | <input type="radio"/>                | <input type="radio"/> | <input type="radio"/>              | <input type="radio"/>          | <input type="radio"/> |
| International evidence        | <input type="radio"/>                      | <input type="radio"/>                | <input type="radio"/> | <input type="radio"/>              | <input type="radio"/>          | <input type="radio"/> |
| HTA recommendation and advice | <input type="radio"/>                      | <input type="radio"/>                | <input type="radio"/> | <input type="radio"/>              | <input type="radio"/>          | <input type="radio"/> |

Please add references for legislation as relevant to HTA in your country: \_\_\_\_\_

Is there a national agency/unit/committee that produces HTA reports? Please choose all that apply:

- Yes  
 No  
 I don't know

What is the institutional entity where HTA is performed? Please choose all that apply:

- HTA organization or agency  
 National committee within the Ministry of Health  
 National unit or department within the Ministry of Health  
 Public Insurance agency or coverage body  
 Other: \_\_\_\_\_

Who is the recipients of the HTA reports?

- Ministry of Health  
 National independent committee related to HTA includes clinicians, patients, citizens, and ethicists  
 Clinicians association  
 Patients association  
 Authority of population welfare on behalf of citizens  
 Other: \_\_\_\_\_

Please provide as possible, which of the following professional human resources are involved in the different processes of HTA, including reports preparation, judgment assessment, appraisal, and decisions. Please select the column only when applicable.

|                                       | Clinical interventions | Medical devices       | Medicines             | Population level health interventions | Service delivery models | Surgical interventions | Vaccines              | Others                |
|---------------------------------------|------------------------|-----------------------|-----------------------|---------------------------------------|-------------------------|------------------------|-----------------------|-----------------------|
| Biomedical and /or clinical engineers | <input type="radio"/>  | <input type="radio"/> | <input type="radio"/> | <input type="radio"/>                 | <input type="radio"/>   | <input type="radio"/>  | <input type="radio"/> | <input type="radio"/> |
| Biostatisticians / Statistician       | <input type="radio"/>  | <input type="radio"/> | <input type="radio"/> | <input type="radio"/>                 | <input type="radio"/>   | <input type="radio"/>  | <input type="radio"/> | <input type="radio"/> |
| Civil society representative          | <input type="radio"/>  | <input type="radio"/> | <input type="radio"/> | <input type="radio"/>                 | <input type="radio"/>   | <input type="radio"/>  | <input type="radio"/> | <input type="radio"/> |
| Economists/ health economists         | <input type="radio"/>  | <input type="radio"/> | <input type="radio"/> | <input type="radio"/>                 | <input type="radio"/>   | <input type="radio"/>  | <input type="radio"/> | <input type="radio"/> |
| Epidemiologists                       | <input type="radio"/>  | <input type="radio"/> | <input type="radio"/> | <input type="radio"/>                 | <input type="radio"/>   | <input type="radio"/>  | <input type="radio"/> | <input type="radio"/> |
| Ethicists                             | <input type="radio"/>  | <input type="radio"/> | <input type="radio"/> | <input type="radio"/>                 | <input type="radio"/>   | <input type="radio"/>  | <input type="radio"/> | <input type="radio"/> |
| Lawyers                               | <input type="radio"/>  | <input type="radio"/> | <input type="radio"/> | <input type="radio"/>                 | <input type="radio"/>   | <input type="radio"/>  | <input type="radio"/> | <input type="radio"/> |
| Librarians/information specialists    | <input type="radio"/>  | <input type="radio"/> | <input type="radio"/> | <input type="radio"/>                 | <input type="radio"/>   | <input type="radio"/>  | <input type="radio"/> | <input type="radio"/> |
| Medical doctors                       | <input type="radio"/>  | <input type="radio"/> | <input type="radio"/> | <input type="radio"/>                 | <input type="radio"/>   | <input type="radio"/>  | <input type="radio"/> | <input type="radio"/> |
| Health professional organizations     | <input type="radio"/>  | <input type="radio"/> | <input type="radio"/> | <input type="radio"/>                 | <input type="radio"/>   | <input type="radio"/>  | <input type="radio"/> | <input type="radio"/> |
| Nurses                                | <input type="radio"/>  | <input type="radio"/> | <input type="radio"/> | <input type="radio"/>                 | <input type="radio"/>   | <input type="radio"/>  | <input type="radio"/> | <input type="radio"/> |
| Patients representative               | <input type="radio"/>  | <input type="radio"/> | <input type="radio"/> | <input type="radio"/>                 | <input type="radio"/>   | <input type="radio"/>  | <input type="radio"/> | <input type="radio"/> |
| Pharmacists                           | <input type="radio"/>  | <input type="radio"/> | <input type="radio"/> | <input type="radio"/>                 | <input type="radio"/>   | <input type="radio"/>  | <input type="radio"/> | <input type="radio"/> |
| Public Health professionals           | <input type="radio"/>  | <input type="radio"/> | <input type="radio"/> | <input type="radio"/>                 | <input type="radio"/>   | <input type="radio"/>  | <input type="radio"/> | <input type="radio"/> |
| Sociologists                          | <input type="radio"/>  | <input type="radio"/> | <input type="radio"/> | <input type="radio"/>                 | <input type="radio"/>   | <input type="radio"/>  | <input type="radio"/> | <input type="radio"/> |
| Others                                | <input type="radio"/>  | <input type="radio"/> | <input type="radio"/> | <input type="radio"/>                 | <input type="radio"/>   | <input type="radio"/>  | <input type="radio"/> | <input type="radio"/> |

**Please provide as possible, at what relevant stage or step of HTA process the following professional human resources are involved in the different processes of HTA, including appraisal and decisions. (Please select one answer for each row and one answer among choices in the columns)**

|                                       | Horizon Scanning      | Topic Selection       | Scoping & systematic literature search | Evidence collection, synthesis, modeling & Review | Ethical & social implications check | Recommendation        | Public Consultation   | Decision              |
|---------------------------------------|-----------------------|-----------------------|----------------------------------------|---------------------------------------------------|-------------------------------------|-----------------------|-----------------------|-----------------------|
| Not relevant                          | <input type="radio"/> | <input type="radio"/> | <input type="radio"/>                  | <input type="radio"/>                             | <input type="radio"/>               | <input type="radio"/> | <input type="radio"/> | <input type="radio"/> |
| Biomedical and /or clinical engineers | <input type="radio"/> | <input type="radio"/> | <input type="radio"/>                  | <input type="radio"/>                             | <input type="radio"/>               | <input type="radio"/> | <input type="radio"/> | <input type="radio"/> |
| Biostatisticians / Statistician       | <input type="radio"/> | <input type="radio"/> | <input type="radio"/>                  | <input type="radio"/>                             | <input type="radio"/>               | <input type="radio"/> | <input type="radio"/> | <input type="radio"/> |
| Civil society representative          | <input type="radio"/> | <input type="radio"/> | <input type="radio"/>                  | <input type="radio"/>                             | <input type="radio"/>               | <input type="radio"/> | <input type="radio"/> | <input type="radio"/> |
| Economists/ health economists         | <input type="radio"/> | <input type="radio"/> | <input type="radio"/>                  | <input type="radio"/>                             | <input type="radio"/>               | <input type="radio"/> | <input type="radio"/> | <input type="radio"/> |
| Epidemiologists                       | <input type="radio"/> | <input type="radio"/> | <input type="radio"/>                  | <input type="radio"/>                             | <input type="radio"/>               | <input type="radio"/> | <input type="radio"/> | <input type="radio"/> |
| Ethicists                             | <input type="radio"/> | <input type="radio"/> | <input type="radio"/>                  | <input type="radio"/>                             | <input type="radio"/>               | <input type="radio"/> | <input type="radio"/> | <input type="radio"/> |
| Lawyers                               | <input type="radio"/> | <input type="radio"/> | <input type="radio"/>                  | <input type="radio"/>                             | <input type="radio"/>               | <input type="radio"/> | <input type="radio"/> | <input type="radio"/> |
| Librarians/information specialists    | <input type="radio"/> | <input type="radio"/> | <input type="radio"/>                  | <input type="radio"/>                             | <input type="radio"/>               | <input type="radio"/> | <input type="radio"/> | <input type="radio"/> |
| Medical doctors                       | <input type="radio"/> | <input type="radio"/> | <input type="radio"/>                  | <input type="radio"/>                             | <input type="radio"/>               | <input type="radio"/> | <input type="radio"/> | <input type="radio"/> |
| Health professional organizations     | <input type="radio"/> | <input type="radio"/> | <input type="radio"/>                  | <input type="radio"/>                             | <input type="radio"/>               | <input type="radio"/> | <input type="radio"/> | <input type="radio"/> |
| Nurses                                | <input type="radio"/> | <input type="radio"/> | <input type="radio"/>                  | <input type="radio"/>                             | <input type="radio"/>               | <input type="radio"/> | <input type="radio"/> | <input type="radio"/> |
| Patients representative               | <input type="radio"/> | <input type="radio"/> | <input type="radio"/>                  | <input type="radio"/>                             | <input type="radio"/>               | <input type="radio"/> | <input type="radio"/> | <input type="radio"/> |
| Pharmacists                           | <input type="radio"/> | <input type="radio"/> | <input type="radio"/>                  | <input type="radio"/>                             | <input type="radio"/>               | <input type="radio"/> | <input type="radio"/> | <input type="radio"/> |
| Public Health professionals           | <input type="radio"/> | <input type="radio"/> | <input type="radio"/>                  | <input type="radio"/>                             | <input type="radio"/>               | <input type="radio"/> | <input type="radio"/> | <input type="radio"/> |
| Sociologists                          | <input type="radio"/> | <input type="radio"/> | <input type="radio"/>                  | <input type="radio"/>                             | <input type="radio"/>               | <input type="radio"/> | <input type="radio"/> | <input type="radio"/> |
| I don't know                          | <input type="radio"/> | <input type="radio"/> | <input type="radio"/>                  | <input type="radio"/>                             | <input type="radio"/>               | <input type="radio"/> | <input type="radio"/> | <input type="radio"/> |

Do you also consider HTA evaluations conducted by other organizations or countries?

- Yes (specify these organizations/countries): \_\_\_\_\_  
 No  
 N/A

Are conflicts of interest declared for those involved in preparing HTA reports?

- Yes  
 No  
 I don't know

Are the conclusions of HTA reports publicly available and disseminated?

- Yes  
 No  
 I don't know

Where these conclusions or reports are published or disseminated?

- Online public platform  
 Institution website  
 Gazette  
 I don't know  
 Other, please specify \_\_\_\_\_

---

Do the policy outcomes (efficient resources allocation, social welfare, raising public confidence, consistent and rational decisions, health wellbeing improvement, long term benefits of innovation, equity and fairness, best health practices...etc) based on HTA reports become publicly available?

- Yes  
 No  
 I don't know

---

Can civil society feedback on recommendations of an HTA report?

- Yes  
 No  
 I don't know

---

Are stakeholders, including the community, given a chance to review a draft version of the assessment before the report is finalized?

- Yes  
 No  
 I don't know

**PART 5: Resources and capacity supporting HTA processes**

Is there sustainable funding allocated to the HTA (either partial, intermittent funding, or funding itemized in the budget of your institution)?

- Yes  
 No  
 I don't know

Who funds the health technology assessment?

- Entirely government funded  
 Mainly government funded with some private contribution  
 Entirely privately funded  
 Mainly privately funded with some government contribution  
 Entirely Internationally funding sources  
 Partially Internationally funding sources  
 Mainly government funded with HTA producers' contribution  
 Manufacturer or supplier  
 Other: \_\_\_\_\_

In the last 12 months, approximately, how many health technologies or interventions decisions have been assessed by HTA in the public health sector? Estimated number:

\_\_\_\_\_

Please estimate the percentages from the mentioned number according to the following categories:

Clinical interventions \_\_\_\_\_  
 Medical devices \_\_\_\_\_  
 Medicines \_\_\_\_\_  
 Population level health interventions (prevention and promotion) \_\_\_\_\_  
 Service delivery models \_\_\_\_\_  
 Surgical interventions \_\_\_\_\_  
 Vaccines \_\_\_\_\_  
 Other \_\_\_\_\_

Does your institution measure the impact of HTA on decisions?

- Measured  
 Not measured  
 I don't know

If so, how many decisions follow the recommendations

\_\_\_\_\_

**In the past 12 months, which of the organization listed below has requested an assessment?  
Please estimate the frequency of requests using the checklist below. Please choose the appropriate response for each item:**

|                                                                             | Never, almost<br>never (0%- 19%) | A few times<br>(20%-39) | Sometimes<br>(40%-59%) | Frequently<br>(60%-79%) | Always, almost<br>always<br>(80%-100%) |
|-----------------------------------------------------------------------------|----------------------------------|-------------------------|------------------------|-------------------------|----------------------------------------|
| Healthcare professionals                                                    | <input type="radio"/>            | <input type="radio"/>   | <input type="radio"/>  | <input type="radio"/>   | <input type="radio"/>                  |
| Public health care provider (i.e.<br>public hospital)                       | <input type="radio"/>            | <input type="radio"/>   | <input type="radio"/>  | <input type="radio"/>   | <input type="radio"/>                  |
| Industry                                                                    | <input type="radio"/>            | <input type="radio"/>   | <input type="radio"/>  | <input type="radio"/>   | <input type="radio"/>                  |
| Ministry of Health                                                          | <input type="radio"/>            | <input type="radio"/>   | <input type="radio"/>  | <input type="radio"/>   | <input type="radio"/>                  |
| Other government entities ( i.e.<br>finance ministry)                       | <input type="radio"/>            | <input type="radio"/>   | <input type="radio"/>  | <input type="radio"/>   | <input type="radio"/>                  |
| National Regulatory agency                                                  | <input type="radio"/>            | <input type="radio"/>   | <input type="radio"/>  | <input type="radio"/>   | <input type="radio"/>                  |
| Public insurance/ Public<br>Reimbursement Agency<br>/National coverage body | <input type="radio"/>            | <input type="radio"/>   | <input type="radio"/>  | <input type="radio"/>   | <input type="radio"/>                  |
| Procurement agency Other                                                    | <input type="radio"/>            | <input type="radio"/>   | <input type="radio"/>  | <input type="radio"/>   | <input type="radio"/>                  |
| Other                                                                       | <input type="radio"/>            | <input type="radio"/>   | <input type="radio"/>  | <input type="radio"/>   | <input type="radio"/>                  |

Please estimate the number of professional staff involved in the HTA unit/agency/committee (in fulltime equivalents).

- 1-5
- 6-20
- 21-50
- 51-100
- >100

**HTA requires multidisciplinary expertise. Please provide as possible, which of the following professional human resources contribute to the preparation of HTA reports. Please select the column only if applicable.**

|                                       | Clinical interventions | Medical devices       | Medicines             | Population level health interventions | Service delivery models | Surgical interventions | Vaccines              | Others                |
|---------------------------------------|------------------------|-----------------------|-----------------------|---------------------------------------|-------------------------|------------------------|-----------------------|-----------------------|
| Biomedical and /or clinical engineers | <input type="radio"/>  | <input type="radio"/> | <input type="radio"/> | <input type="radio"/>                 | <input type="radio"/>   | <input type="radio"/>  | <input type="radio"/> | <input type="radio"/> |
| Biostatisticians / Statistician       | <input type="radio"/>  | <input type="radio"/> | <input type="radio"/> | <input type="radio"/>                 | <input type="radio"/>   | <input type="radio"/>  | <input type="radio"/> | <input type="radio"/> |
| Civil society representative          | <input type="radio"/>  | <input type="radio"/> | <input type="radio"/> | <input type="radio"/>                 | <input type="radio"/>   | <input type="radio"/>  | <input type="radio"/> | <input type="radio"/> |
| Economists/ health economists         | <input type="radio"/>  | <input type="radio"/> | <input type="radio"/> | <input type="radio"/>                 | <input type="radio"/>   | <input type="radio"/>  | <input type="radio"/> | <input type="radio"/> |
| Epidemiologists                       | <input type="radio"/>  | <input type="radio"/> | <input type="radio"/> | <input type="radio"/>                 | <input type="radio"/>   | <input type="radio"/>  | <input type="radio"/> | <input type="radio"/> |
| Ethicists                             | <input type="radio"/>  | <input type="radio"/> | <input type="radio"/> | <input type="radio"/>                 | <input type="radio"/>   | <input type="radio"/>  | <input type="radio"/> | <input type="radio"/> |
| Lawyers                               | <input type="radio"/>  | <input type="radio"/> | <input type="radio"/> | <input type="radio"/>                 | <input type="radio"/>   | <input type="radio"/>  | <input type="radio"/> | <input type="radio"/> |
| Librarians/information specialists    | <input type="radio"/>  | <input type="radio"/> | <input type="radio"/> | <input type="radio"/>                 | <input type="radio"/>   | <input type="radio"/>  | <input type="radio"/> | <input type="radio"/> |
| Medical doctors                       | <input type="radio"/>  | <input type="radio"/> | <input type="radio"/> | <input type="radio"/>                 | <input type="radio"/>   | <input type="radio"/>  | <input type="radio"/> | <input type="radio"/> |
| Health professional organizations     | <input type="radio"/>  | <input type="radio"/> | <input type="radio"/> | <input type="radio"/>                 | <input type="radio"/>   | <input type="radio"/>  | <input type="radio"/> | <input type="radio"/> |
| Nurses                                | <input type="radio"/>  | <input type="radio"/> | <input type="radio"/> | <input type="radio"/>                 | <input type="radio"/>   | <input type="radio"/>  | <input type="radio"/> | <input type="radio"/> |
| Patients representative               | <input type="radio"/>  | <input type="radio"/> | <input type="radio"/> | <input type="radio"/>                 | <input type="radio"/>   | <input type="radio"/>  | <input type="radio"/> | <input type="radio"/> |
| Pharmacists                           | <input type="radio"/>  | <input type="radio"/> | <input type="radio"/> | <input type="radio"/>                 | <input type="radio"/>   | <input type="radio"/>  | <input type="radio"/> | <input type="radio"/> |
| Public Health professionals           | <input type="radio"/>  | <input type="radio"/> | <input type="radio"/> | <input type="radio"/>                 | <input type="radio"/>   | <input type="radio"/>  | <input type="radio"/> | <input type="radio"/> |
| Sociologists                          | <input type="radio"/>  | <input type="radio"/> | <input type="radio"/> | <input type="radio"/>                 | <input type="radio"/>   | <input type="radio"/>  | <input type="radio"/> | <input type="radio"/> |
| Others                                | <input type="radio"/>  | <input type="radio"/> | <input type="radio"/> | <input type="radio"/>                 | <input type="radio"/>   | <input type="radio"/>  | <input type="radio"/> | <input type="radio"/> |

Does the Ministry of Health or whoever else is the responsible entity commission independent agencies (NGO's, Academics, etc.) to elaborate, prepare, appraise HTA submissions.

Yes  
 No  
 I don't know

Is there one or more agency/unit/committee that produces HTA reports for a subnational level?

Yes  
 No  
 I don't know

What is the institutional structure of this HTA body?

Department or unit within Ministry of Health  
 Department or unit within another public sector body  
 Standalone public sector institution  
 Other academic or research institution  
 NGO (non-governmental organization)  
 Private sector  
 Other \_\_\_\_\_  
 I Don't know

Please specify details for every national and subnational agency/unit/committee provided HTA services during the last two years.

|                          | agency/unit/committee | Website | Contact Name | Contact e-mail |
|--------------------------|-----------------------|---------|--------------|----------------|
| <b>National Level</b>    |                       |         |              |                |
| 1                        | _____                 | _____   | _____        | _____          |
| 2                        | _____                 | _____   | _____        | _____          |
| 3                        | _____                 | _____   | _____        | _____          |
| <b>Subnational Level</b> |                       |         |              |                |
| 1                        | _____                 | _____   | _____        | _____          |

2 \_\_\_\_\_  
3 \_\_\_\_\_

**PART 6: Interests and impediments to build capacity**

Please select from the list below, what impedes at country level the use of HTA in health care policy decision-making. The lack of: (Please choose all that apply)

- Lack of Awareness/Advocacy of the importance of HTA
- Lack of Institutionalization of HTA
- Missing Mandate from Policy Authority
- Lack of Political support
- Lack of Qualified human resources
- Lack of Institutional capacity (setting-up process and well-functioning operations, IT systems supporting HTA, etc.)
- Other: \_\_\_\_\_

**Please select from list below, what would help to strengthen HTA production capabilities and structure? (Please place one single answer "checkmark" for each row)**

|                                                                                                                   | Not at all important  | Slightly Important    | Important             | Fairly Important      | Very Important        |
|-------------------------------------------------------------------------------------------------------------------|-----------------------|-----------------------|-----------------------|-----------------------|-----------------------|
| Information availability                                                                                          | <input type="radio"/> | <input type="radio"/> | <input type="radio"/> | <input type="radio"/> | <input type="radio"/> |
| Knowledge of methods                                                                                              | <input type="radio"/> | <input type="radio"/> | <input type="radio"/> | <input type="radio"/> | <input type="radio"/> |
| Qualified human resources                                                                                         | <input type="radio"/> | <input type="radio"/> | <input type="radio"/> | <input type="radio"/> | <input type="radio"/> |
| Budget increase                                                                                                   | <input type="radio"/> | <input type="radio"/> | <input type="radio"/> | <input type="radio"/> | <input type="radio"/> |
| Training                                                                                                          | <input type="radio"/> | <input type="radio"/> | <input type="radio"/> | <input type="radio"/> | <input type="radio"/> |
| Awareness of HTA advantages                                                                                       | <input type="radio"/> | <input type="radio"/> | <input type="radio"/> | <input type="radio"/> | <input type="radio"/> |
| Public knowledge of decision failures                                                                             | <input type="radio"/> | <input type="radio"/> | <input type="radio"/> | <input type="radio"/> | <input type="radio"/> |
| Patient advocacy/engagement                                                                                       | <input type="radio"/> | <input type="radio"/> | <input type="radio"/> | <input type="radio"/> | <input type="radio"/> |
| Institutional strengthening (setting-up process and well-functioning operations, IT systems supporting HTA, etc.) | <input type="radio"/> | <input type="radio"/> | <input type="radio"/> | <input type="radio"/> | <input type="radio"/> |
| Other, specify with rate of importance ...                                                                        | <input type="radio"/> | <input type="radio"/> | <input type="radio"/> | <input type="radio"/> | <input type="radio"/> |

Are there any academic or training programs in your country to support HTA capacity building? Please choose all that apply:

- Courses/seminars/workshops  
 Higher education/Masters  
 Internal staff training sessions or workshops  
 None  
 Other: \_\_\_\_\_

**Is there interest in international HTA training and knowledge platform for continuous education on HTA (Please place one single answer "checkmark" for each row)**

|                                                                            | Not at all important  | Slightly Important    | Important             | Fairly Important      | Very Important        |
|----------------------------------------------------------------------------|-----------------------|-----------------------|-----------------------|-----------------------|-----------------------|
| Offering international training on HTA                                     | <input type="radio"/> | <input type="radio"/> | <input type="radio"/> | <input type="radio"/> | <input type="radio"/> |
| Participating in international courses on specific subjects                | <input type="radio"/> | <input type="radio"/> | <input type="radio"/> | <input type="radio"/> | <input type="radio"/> |
| Participating in international continuous education on HTA (certification) | <input type="radio"/> | <input type="radio"/> | <input type="radio"/> | <input type="radio"/> | <input type="radio"/> |
| Participating in expert training on HTA (degree)                           | <input type="radio"/> | <input type="radio"/> | <input type="radio"/> | <input type="radio"/> | <input type="radio"/> |
| International exchange for Hands-on practice                               | <input type="radio"/> | <input type="radio"/> | <input type="radio"/> | <input type="radio"/> | <input type="radio"/> |
| Other, specify with rate of importance ...                                 | <input type="radio"/> | <input type="radio"/> | <input type="radio"/> | <input type="radio"/> | <input type="radio"/> |

Final comments Please add any general comments on the survey:

---

**Team Members**

Team Leader

Institutional Position \_\_\_\_\_

Age \_\_\_\_\_

Gender \_\_\_\_\_

Educational level \_\_\_\_\_

Years of experience \_\_\_\_\_

Level of management \_\_\_\_\_

Email \_\_\_\_\_

Team Member 1

Institutional Position \_\_\_\_\_

Age \_\_\_\_\_

Gender \_\_\_\_\_

Educational level \_\_\_\_\_

Years of experience \_\_\_\_\_

Level of management \_\_\_\_\_

Email \_\_\_\_\_

Team Member 2

Institutional Position \_\_\_\_\_

Age \_\_\_\_\_

Gender \_\_\_\_\_

Educational level \_\_\_\_\_

Years of experience \_\_\_\_\_

Level of management \_\_\_\_\_

Email \_\_\_\_\_

Team Member 3

Institutional Position \_\_\_\_\_

Age \_\_\_\_\_

Gender \_\_\_\_\_

Educational level \_\_\_\_\_

Years of experience \_\_\_\_\_

Level of management \_\_\_\_\_

Email \_\_\_\_\_

Team Member 4

Institutional Position \_\_\_\_\_

Age \_\_\_\_\_

Gender \_\_\_\_\_

Educational level \_\_\_\_\_

Years of experience \_\_\_\_\_

Level of management \_\_\_\_\_

Email \_\_\_\_\_

Team Member 5

Institutional Position \_\_\_\_\_

Age \_\_\_\_\_

Gender \_\_\_\_\_

Educational level \_\_\_\_\_

Years of experience \_\_\_\_\_

Level of management \_\_\_\_\_

Email \_\_\_\_\_

06/10/2021 10:06pm

---

Team Member 6

Institutional Position \_\_\_\_\_

Age \_\_\_\_\_

Gender \_\_\_\_\_

Educational level \_\_\_\_\_

Years of experience \_\_\_\_\_

Level of management \_\_\_\_\_

Email \_\_\_\_\_
